# Supplementary material
Source: PubMed Central journal article supplement (PMC10984770)
Supplement: NIHMS1964070-supplement-4.pdf [file NIHMS1964070-supplement-4.pdf]

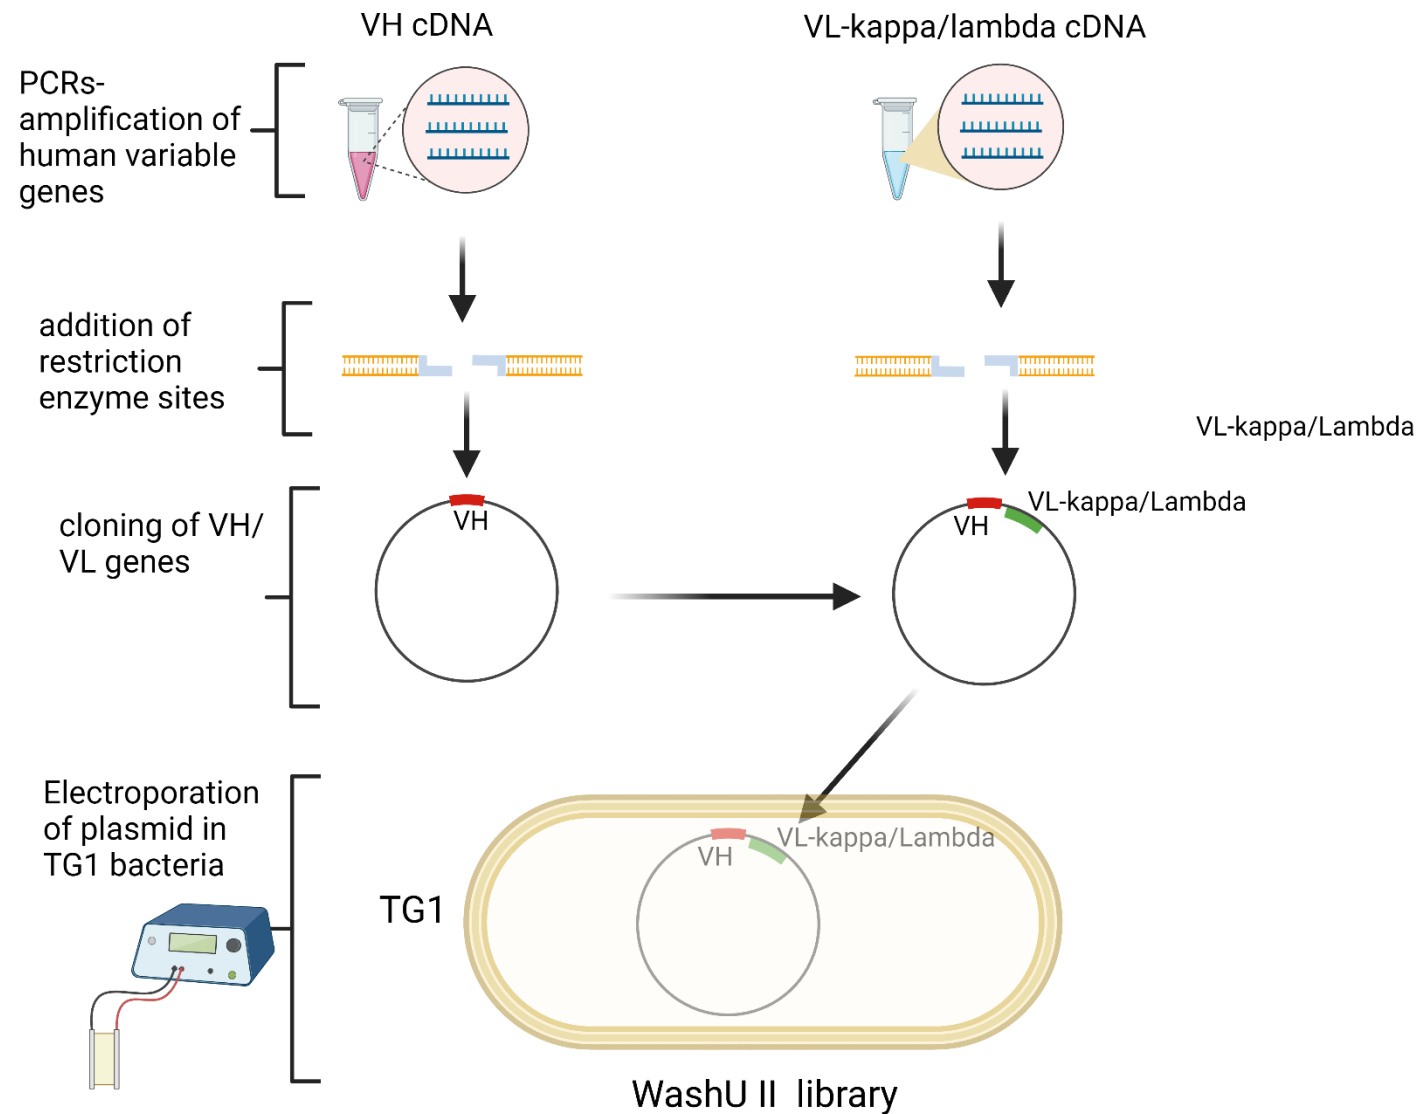

**Supplementary Figure 1.** Strategy for WashU II phage display library creation. The human antibody repertoires were amplified by PCR from the cDNA of mixed human peripheral blood mononuclear cells and cloned randomly into a phagemid vector. This vector encodes for a 16 aa linker (G4S)3T between the VH and VL domain of the scFv and adds an additional C-terminal 6xHis and Flag tag. First, the VH and VL repertoires were amplified in the first set of PCRs and completed by SfiI/XhoI (VH) or SalI/NotI (VL) restriction sites in the second set of PCRs. The VH repertoires were cloned first by electroporation in *E. coli* TG1 (Lucigen, #60502), followed by cloning of the VLkappa or VL-lambda repertoires.
