# Supplementary material
Source: PubMed Central journal article supplement (PMC10984770)
Supplement: NIHMS1964070-supplement-5.pdf [file NIHMS1964070-supplement-5.pdf]

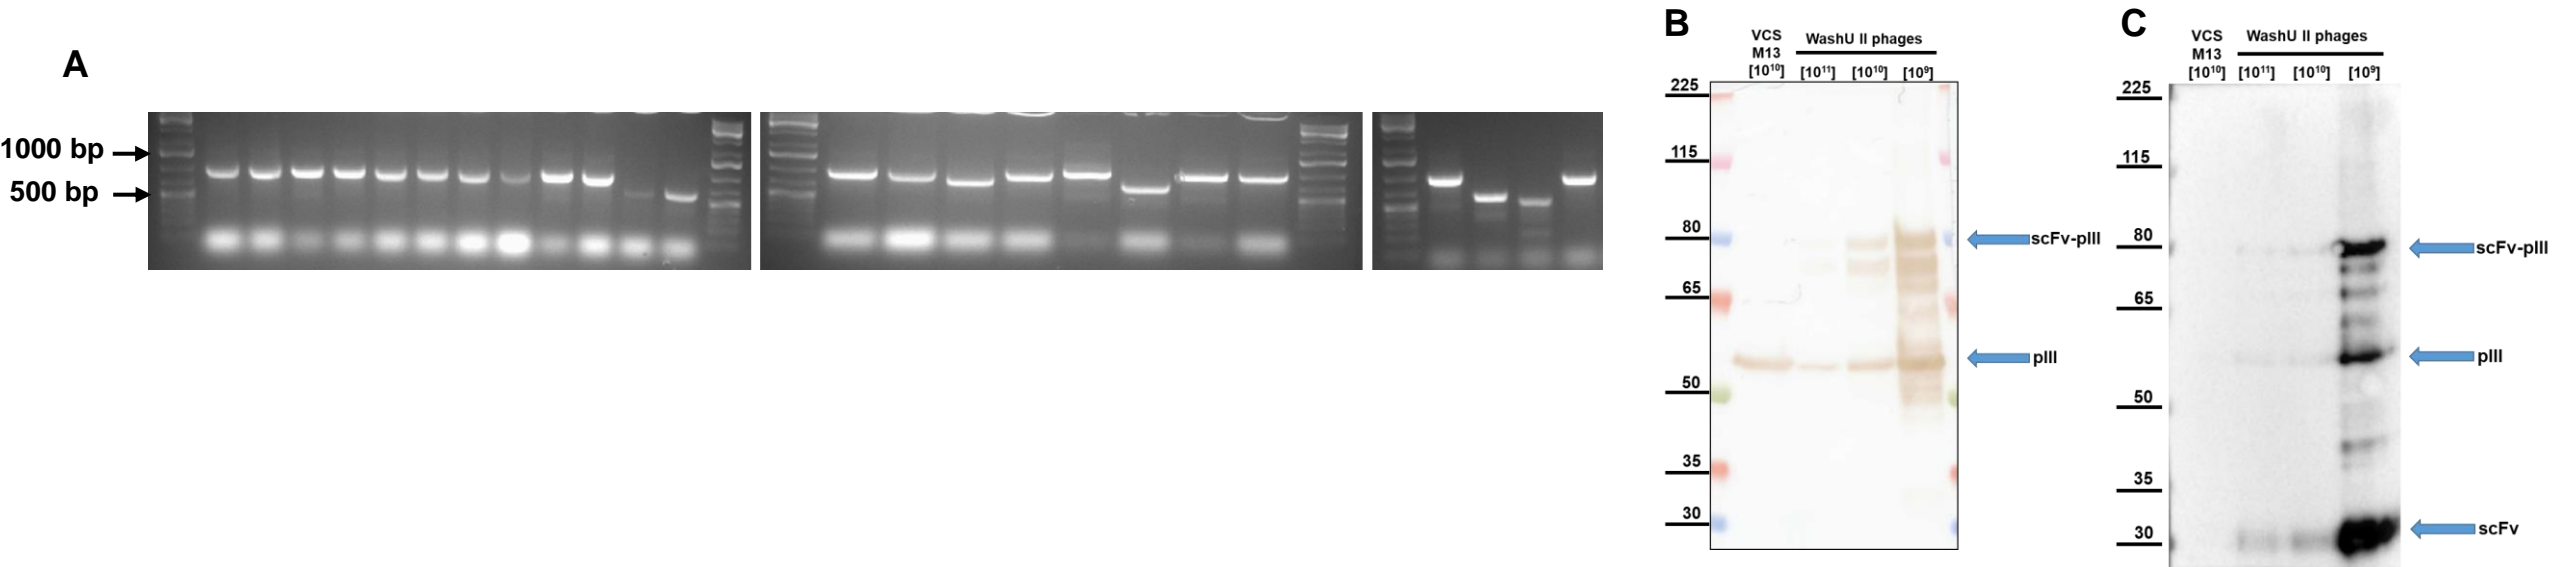

**Supplementary Figure 2.** **A.** Colony PCR showing the completeness of the WashU II library. **B.** Western blots for the WashU II phages at different dilutions were developed with an anti-pIII antibody showing the fused scFv with the pIII coat protein of the M13 phage. **C.** Western blots for the WashU II phages at different dilutions were developed with an anti-Flag antibody showing the full-length scFv on the M13 phage.
