# Supplementary material
Source: PubMed Central journal article supplement (PMC10984770)
Supplement: NIHMS1964070-supplement-6.pdf [file NIHMS1964070-supplement-6.pdf]

**A****Protein A purification**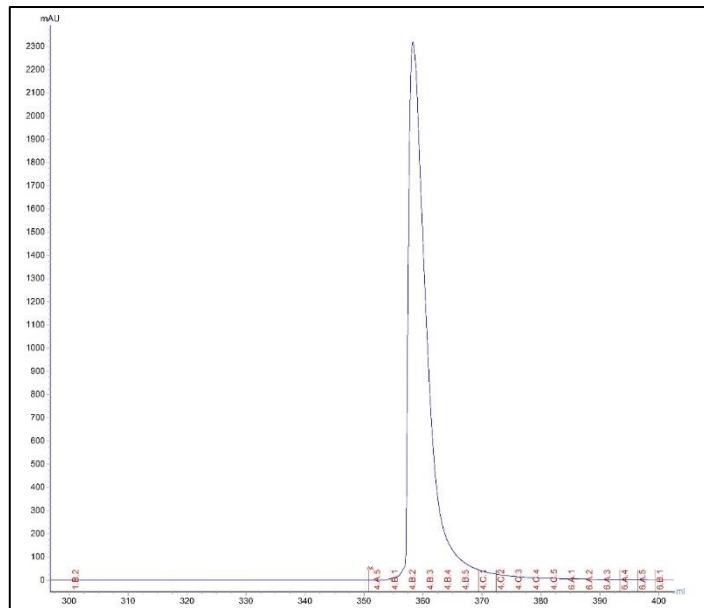**B****Size-exclusion chromatography**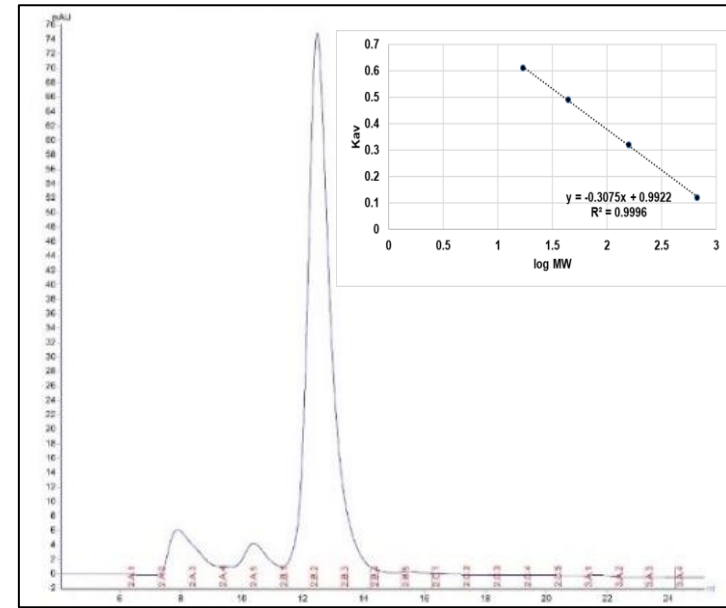

**Supplementary Figure 3. A.** Representative chromatogram showing protein A purification profile of the L111 antibody. **B.** Representative size exclusion chromatogram in S200 10/300 GL columns of the purified L111 antibody.
