# Supplementary material
Source: PubMed Central journal article supplement (PMC10984770)
Supplement: NIHMS1964070-supplement-7.pdf [file NIHMS1964070-supplement-7.pdf]

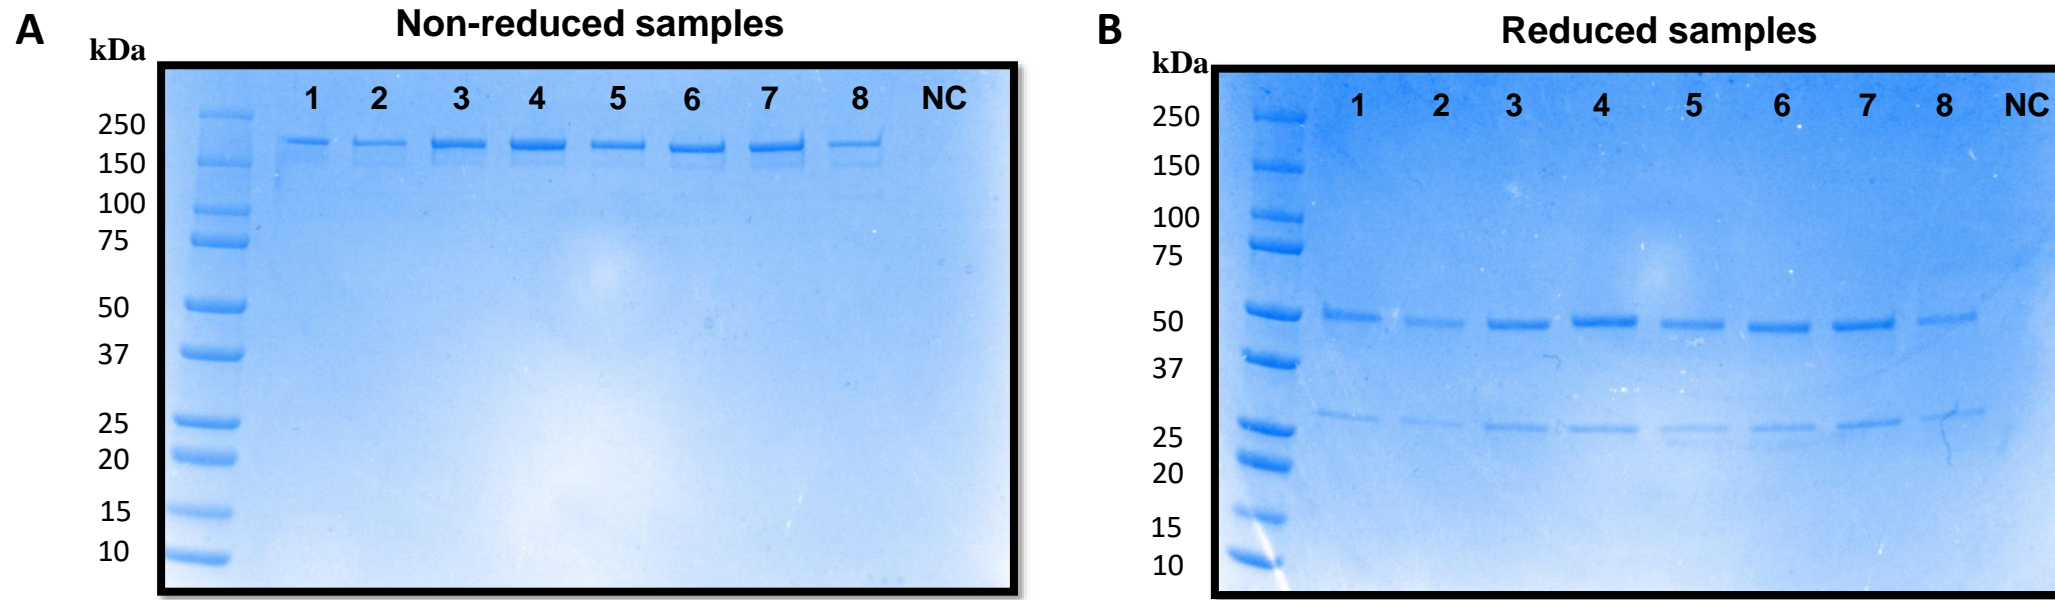

| S. No.  | 1   | 2    | 3   | 4    | 5    | 6    | 7    | 8    |
|---------|-----|------|-----|------|------|------|------|------|
| Ab name | L38 | L111 | L56 | L112 | L117 | L127 | L144 | L154 |

**Supplementary Figure 4.** SDS-PAGE of eight unique purified human anti-TIP1 full-length IgGs under non-reducing (**A**) and reducing conditions (**B**). **A.** Intact full-length IgGs are observed above 150 kDa. **B.** In the reducing condition, heavy chains and light chains are observed at 50 kDa and 25 kDa, respectively.
