# Supplementary material
Source: PubMed Central journal article supplement (PMC10984770)
Supplement: NIHMS1964070-supplement-8.pdf [file NIHMS1964070-supplement-8.pdf]

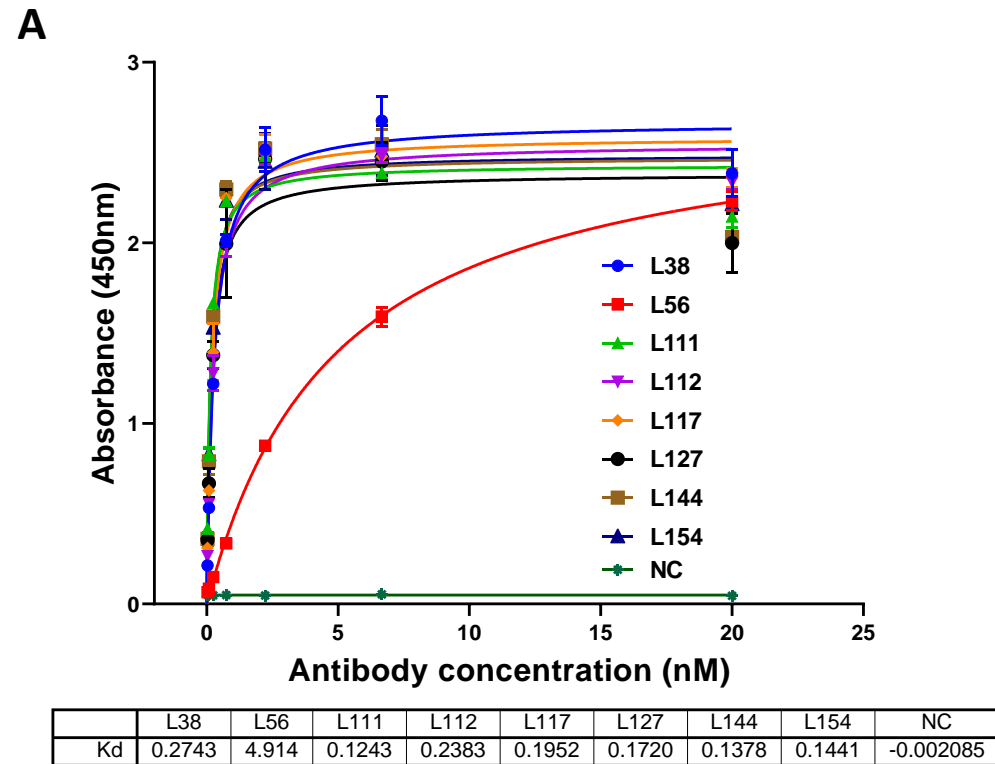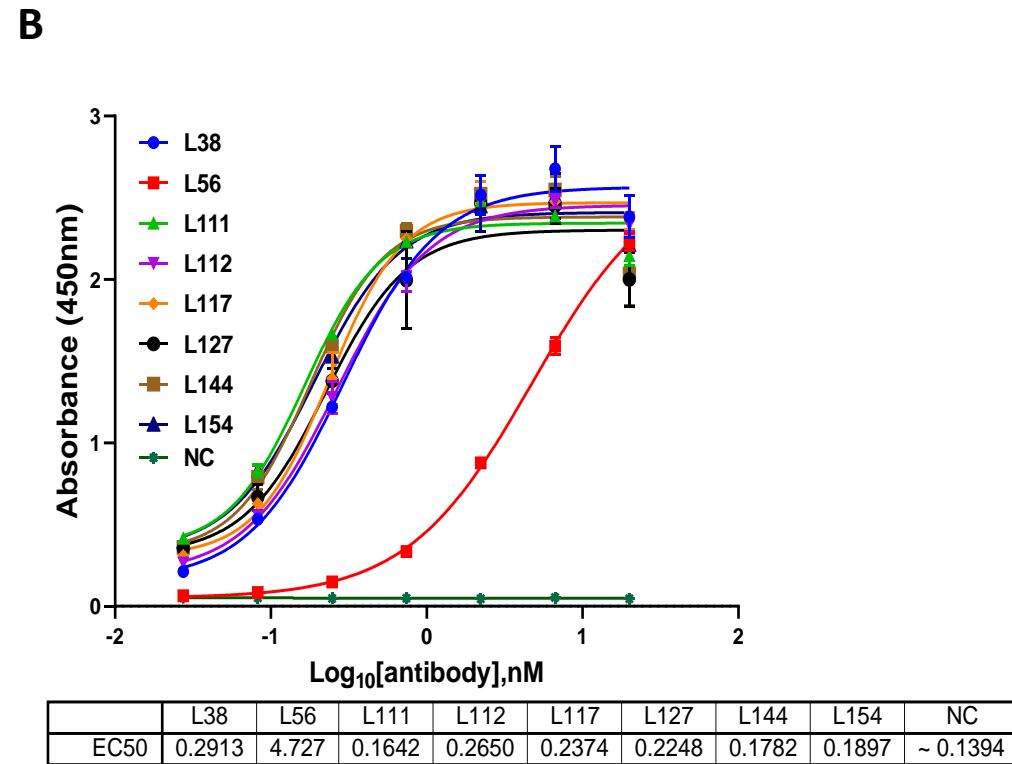

**Supplementary Figure 5.** ELISA shows the affinity of purified human anti-TIP1 full-length IgG1 to TIP1 protein. Recombinant TIP1 protein was coated on ELISA plates. Three-fold serial dilutions (starting at 20 nM) of the purified human anti-TIP1 full-length IgG1 antibodies were incubated with the protein. Anti-human HRP conjugated antibody was used as the detection antibody along with TMB substrate. Absorbance at 450nm vs concentration is plotted in the graph. The data were fitted using the **A.** “One-site specific” and **B.** log(agonist) vs. response -- Variable slope (four parameters) model in GraphPad Prism software. The  $K_d$  and  $EC_{50}$  values are shown in the table below each graph.
