# Supplementary material
Source: PubMed Central journal article supplement (PMC10984770)
Supplement: NIHMS1964070-supplement-9.pdf [file NIHMS1964070-supplement-9.pdf]

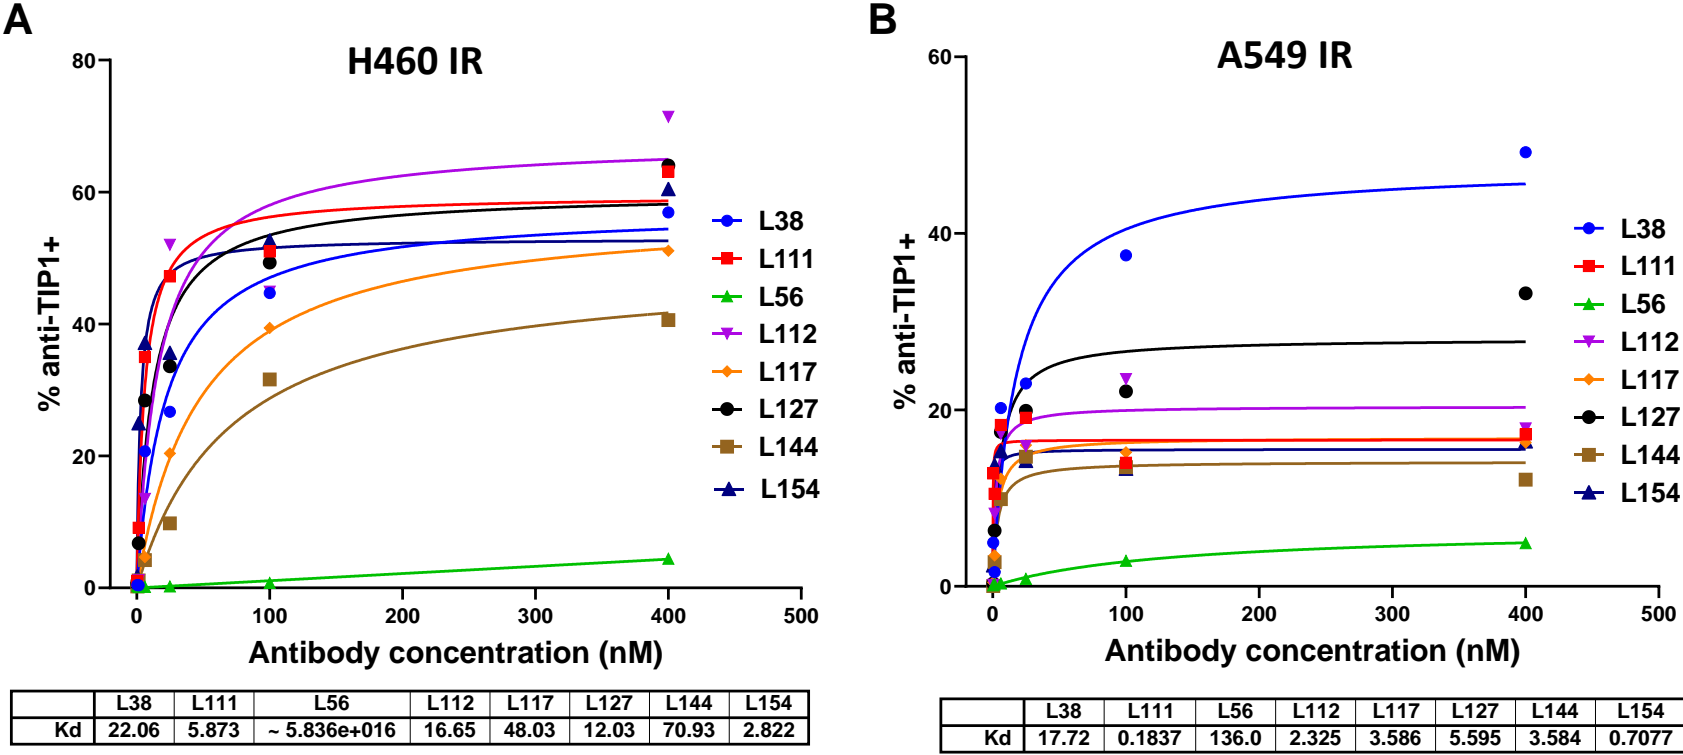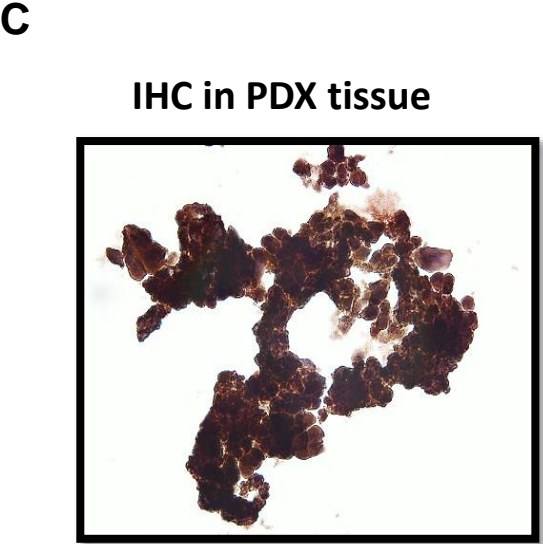

**Supplementary Figure 6.** Flow cytometry evaluation of the purified anti-TIP1 antibodies on H460 (A) and A549 (B) cells. The percentage of anti-TIP1+ vs. antibody concentration was plotted in GraphPad Prism software using One Site-specific binding model. The table below represents the Kd values. C. Immunohistochemistry shows intense TIP1 staining in the human patient-derived xenograft tissue.
