# Supplementary material
Source: PubMed Central journal article supplement (PMC10984770)
Supplement: NIHMS1964070-supplement-10.pdf [file NIHMS1964070-supplement-10.pdf]

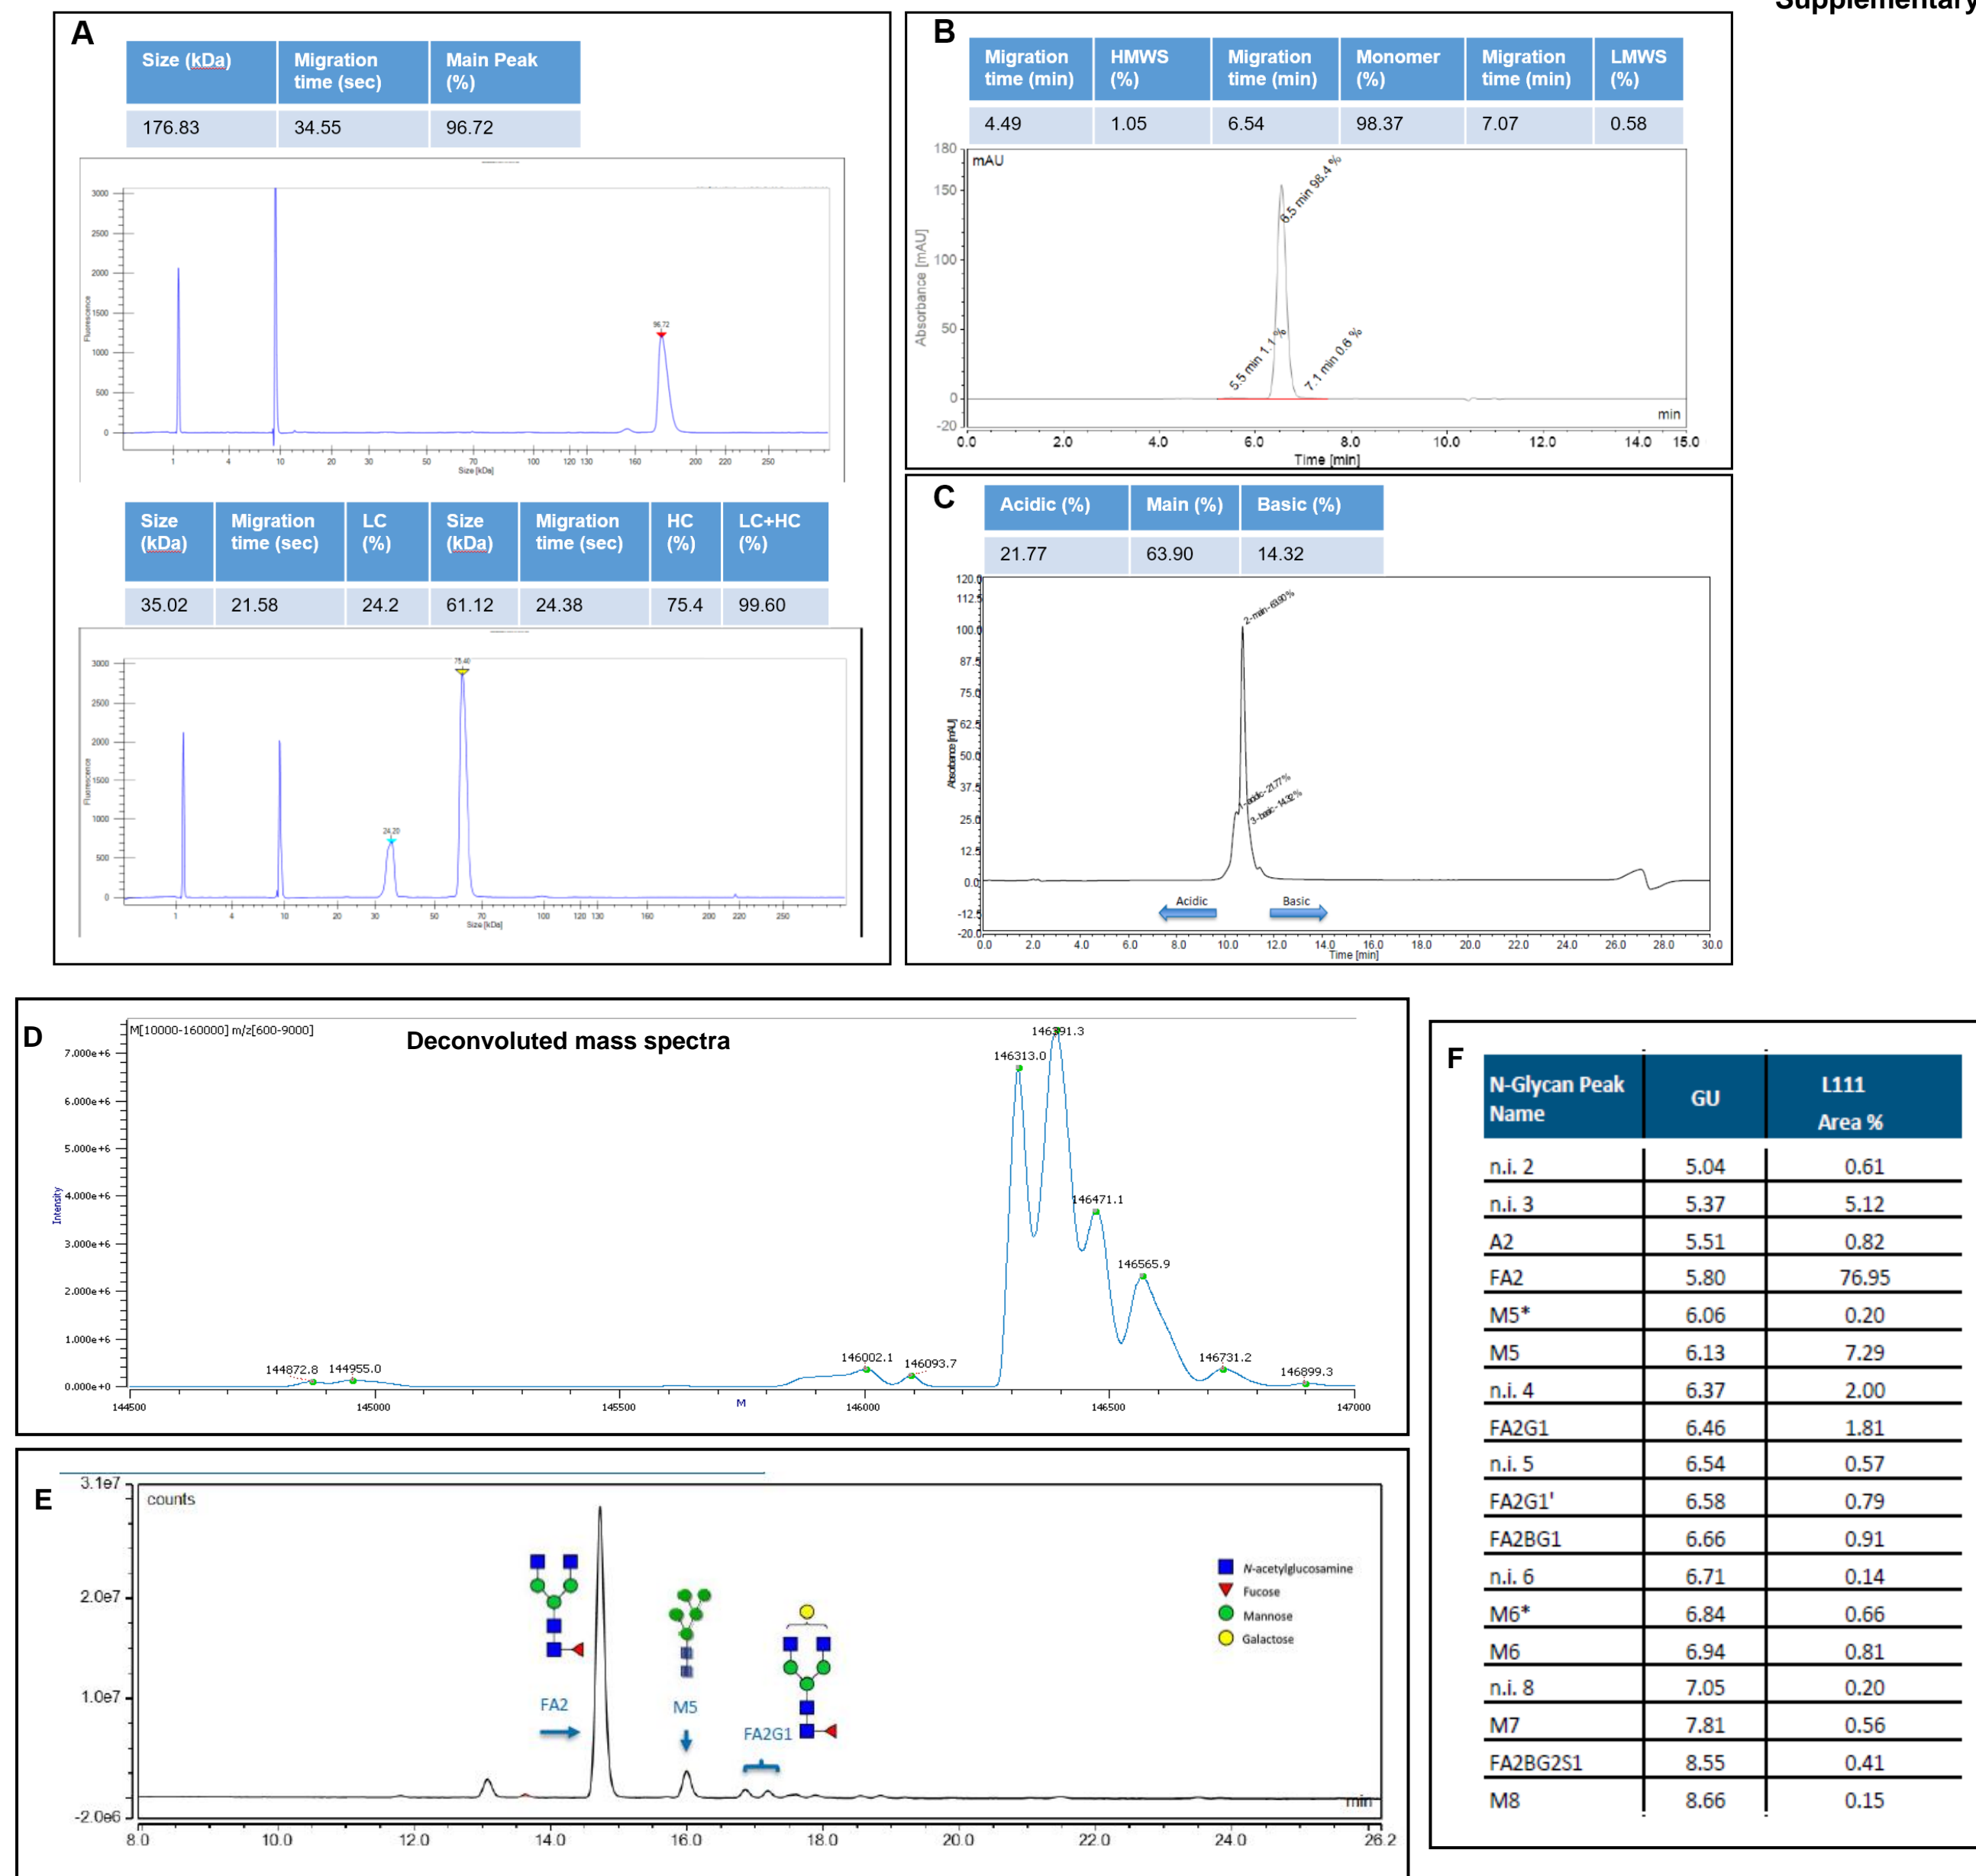

**Supplementary Figure 7. Biophysical characterization of the purified L111 antibody.** **A.** Analysis of purified L111 antibody integrity by non-reduced (top) and reduced (bottom) capillary electrophoresis-SDS (CE-SDS) on a Perkin Elmer LabChip GXII Touch HT. The table shows the size and migration times of the non-reduced and reduced antibody samples. **B.** Size-exclusion chromatography high-performance liquid chromatography (SEC-HPLC) analysis of the purified L111 antibody. The table shows the percentage of monomers and high molecular weight species (HMWS). **C.** Cation-exchange chromatography of the purified L111 antibody. **D.** Deconvoluted mass spectrometry spectra of the purified L111 antibody. **E and F.** Analysis of Fc N-Glycan profiles and major glycans distribution by Hydrophilic interaction liquid chromatography (HILIC)-in combination with fluorescence detection (FLD). **F.** Table shows the percentage of each N-Glycan in the L111 antibody.
