# Supplementary material
Source: PubMed Central journal article supplement (PMC10984770)
Supplement: NIHMS1964070-supplement-11.pdf [file NIHMS1964070-supplement-11.pdf]

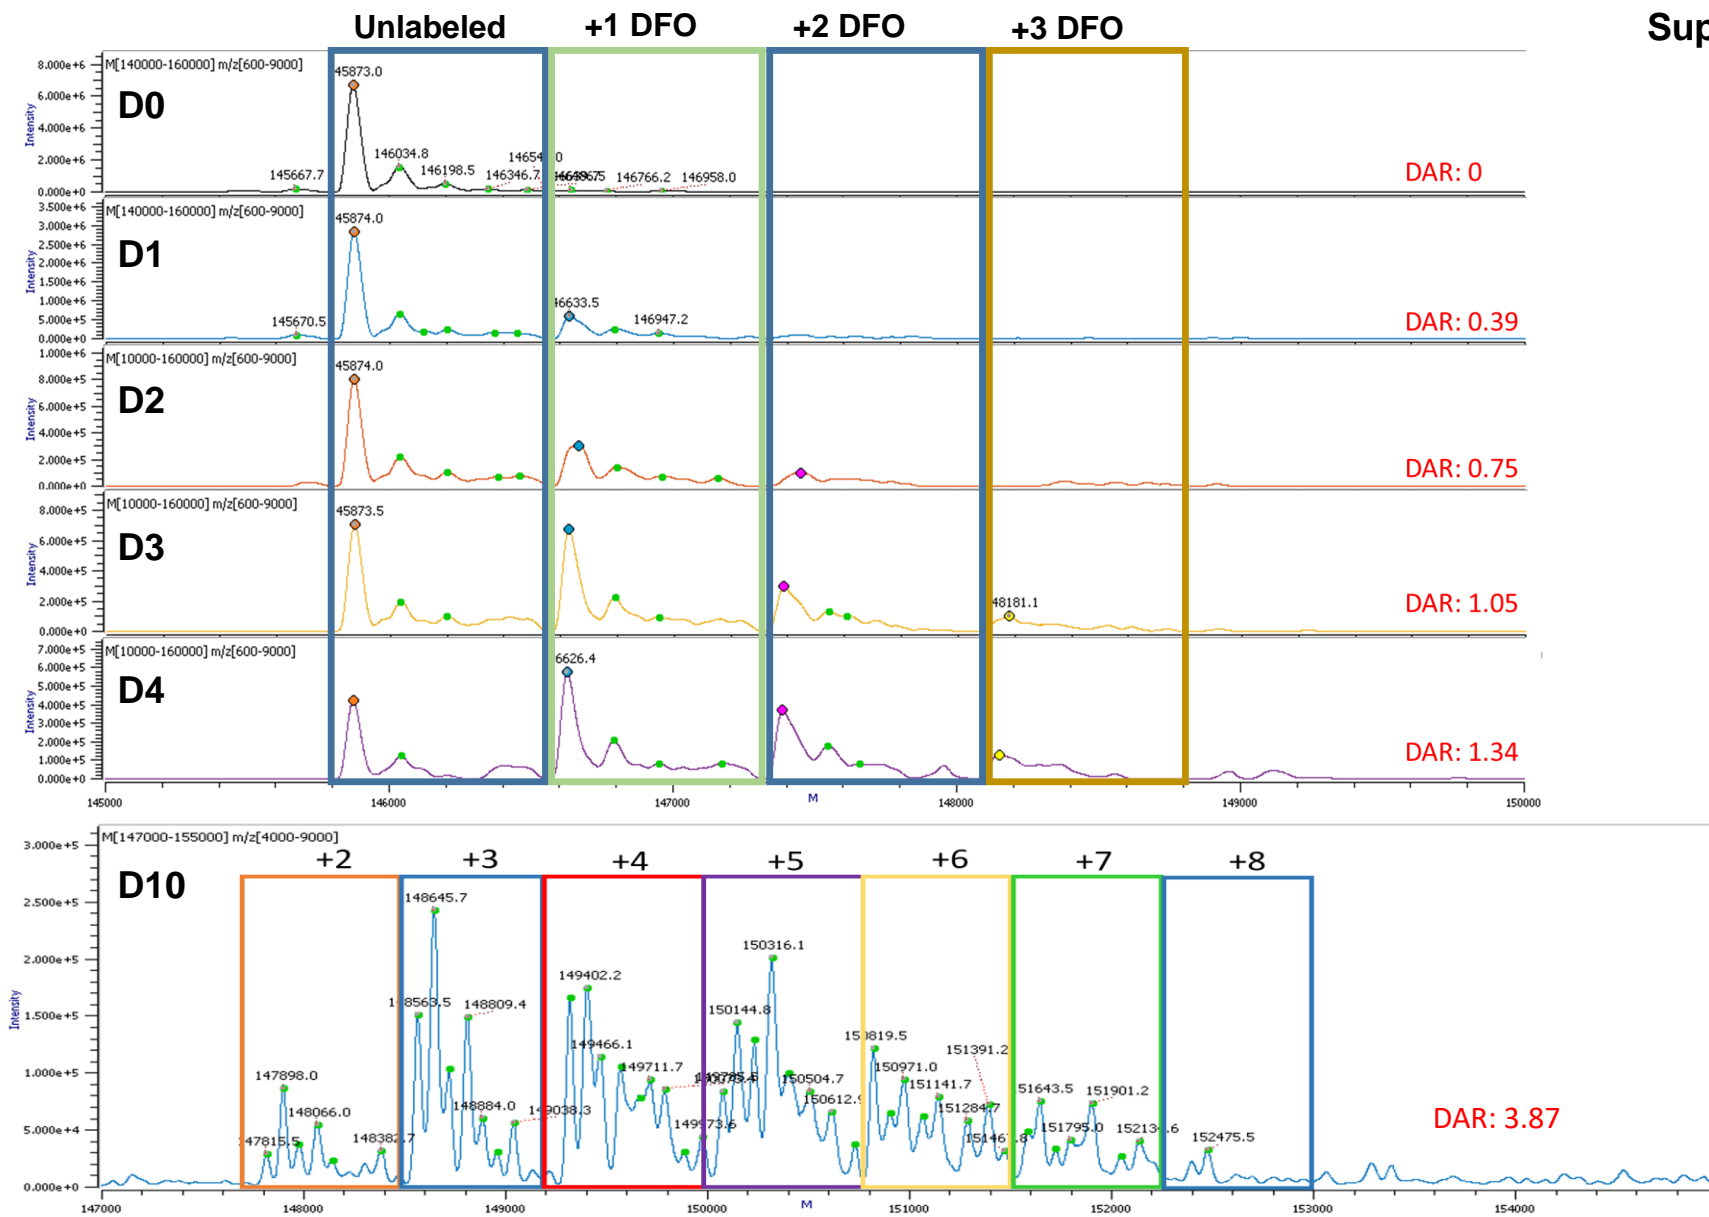

**Supplementary Figure 8.** DFO-to-L111 ratio (DAR) analysis by native MS. The deconvoluted mass spectra (deconvoluted using Intact Mass, Protein Metrics Inc) show the increasing numbers of DFO (+1 to +8). The respective DARs are shown in red.
