# Supplementary material
Source: PubMed Central journal article supplement (PMC10984770)
Supplement: NIHMS1964070-supplement-13.pdf [file NIHMS1964070-supplement-13.pdf]

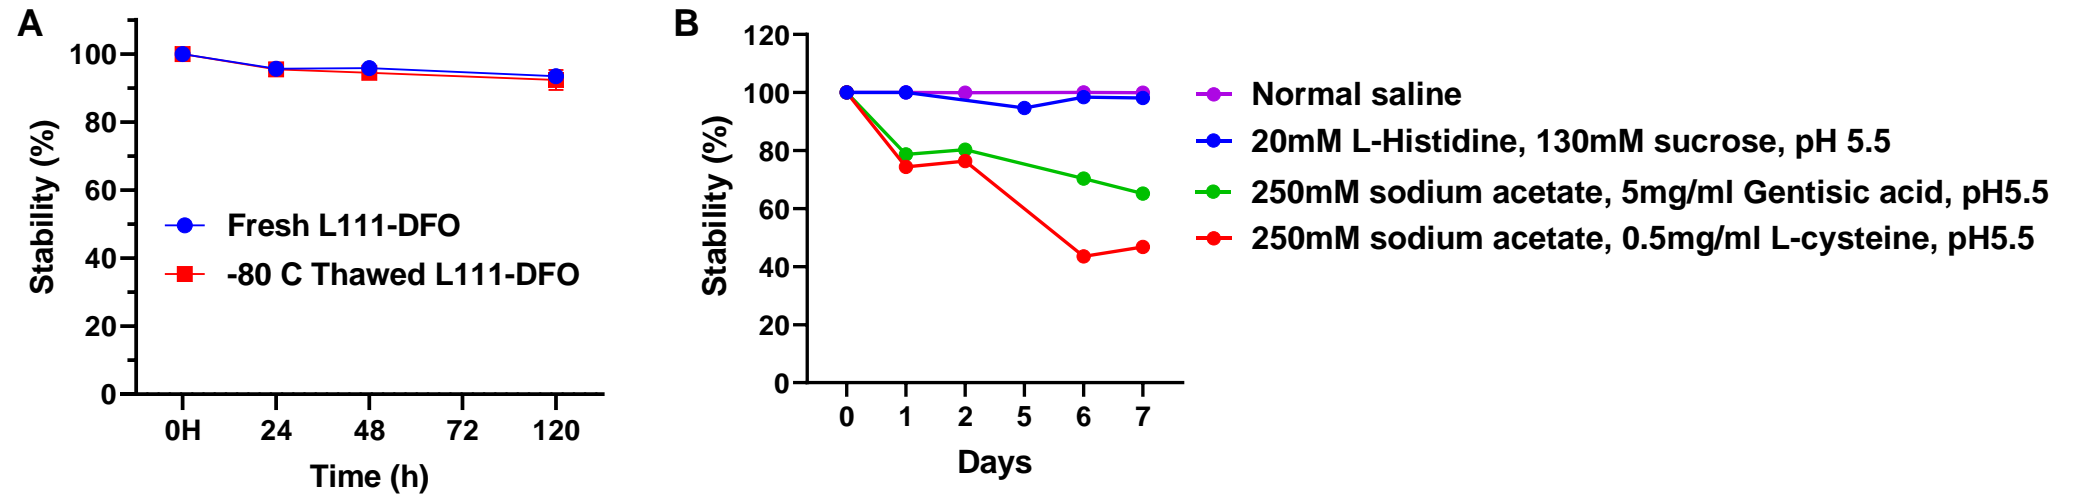

**Supplementary Figure 10. A.** *In vitro* stability of [ $^{89}\text{Zr}$ ]Zr-DFO-L111 antibodies that were either freshly conjugated with DFO or thawed from  $-80^{\circ}\text{C}$  after DFO conjugation. The stability was assessed in human serum by instant thin-layer chromatography. **B.** *In vitro* serum stability of [ $^{89}\text{Zr}$ ]Zr-DFO-L111 antibodies in four different buffers. The stability was assessed in human serum by instant thin layer chromatography.
