# Supplementary material
Source: PubMed Central journal article supplement (PMC10984770)
Supplement: NIHMS1964070-supplement-14.pdf [file NIHMS1964070-supplement-14.pdf]

## Supplementary Figure 11

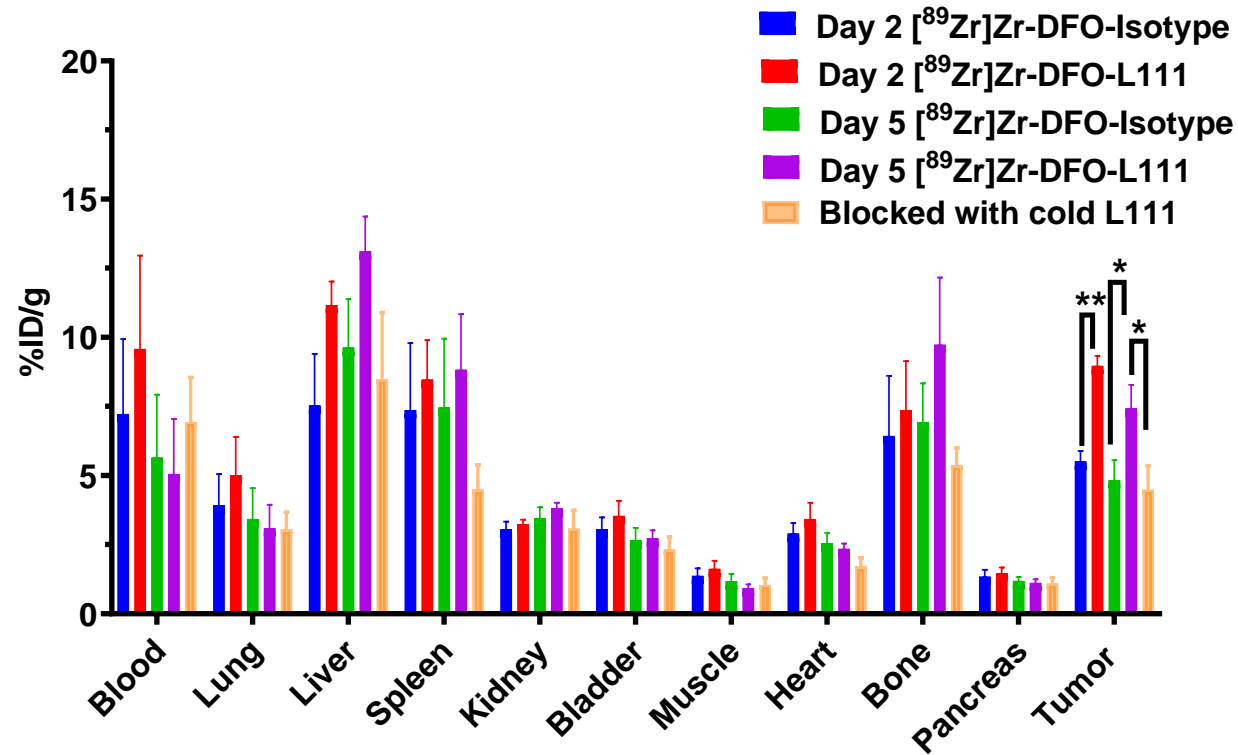

**Supplementary Figure 11. Specific uptake of the [89Zr]Zr-DFO-L111 in tumors *in vivo*.** Bar graph showing the uptake of the [89Zr]Zr-DFO-Isotype or [89Zr]Zr-DFO-L111 at days 2 and 5 in nude mice bearing A549 tumors in the hindlimb (n=4). Tumors were irradiated with three doses of 3Gy over 24h, followed by injection with radiolabeled antibodies. Cold anti-TIP1 Ab was injected before injecting the radiolabeled for the blocking study. Bar graphs represent %ID/gm. \*P<0.05, \*\*P<0.01
