# Supplementary material
Source: PubMed Central journal article supplement (PMC10984770)
Supplement: NIHMS1964070-supplement-15.pdf [file NIHMS1964070-supplement-15.pdf]

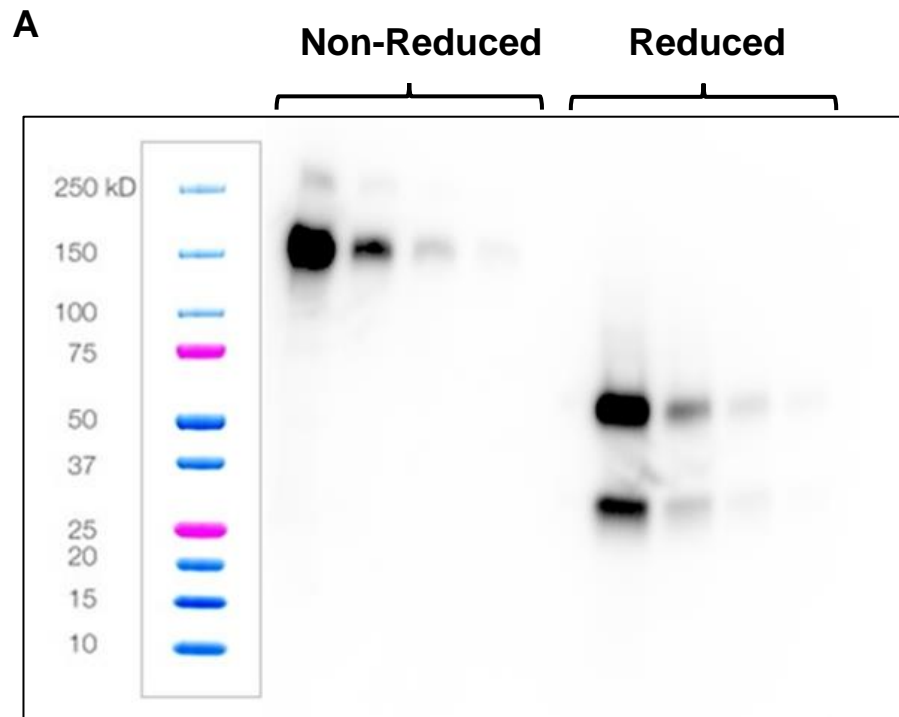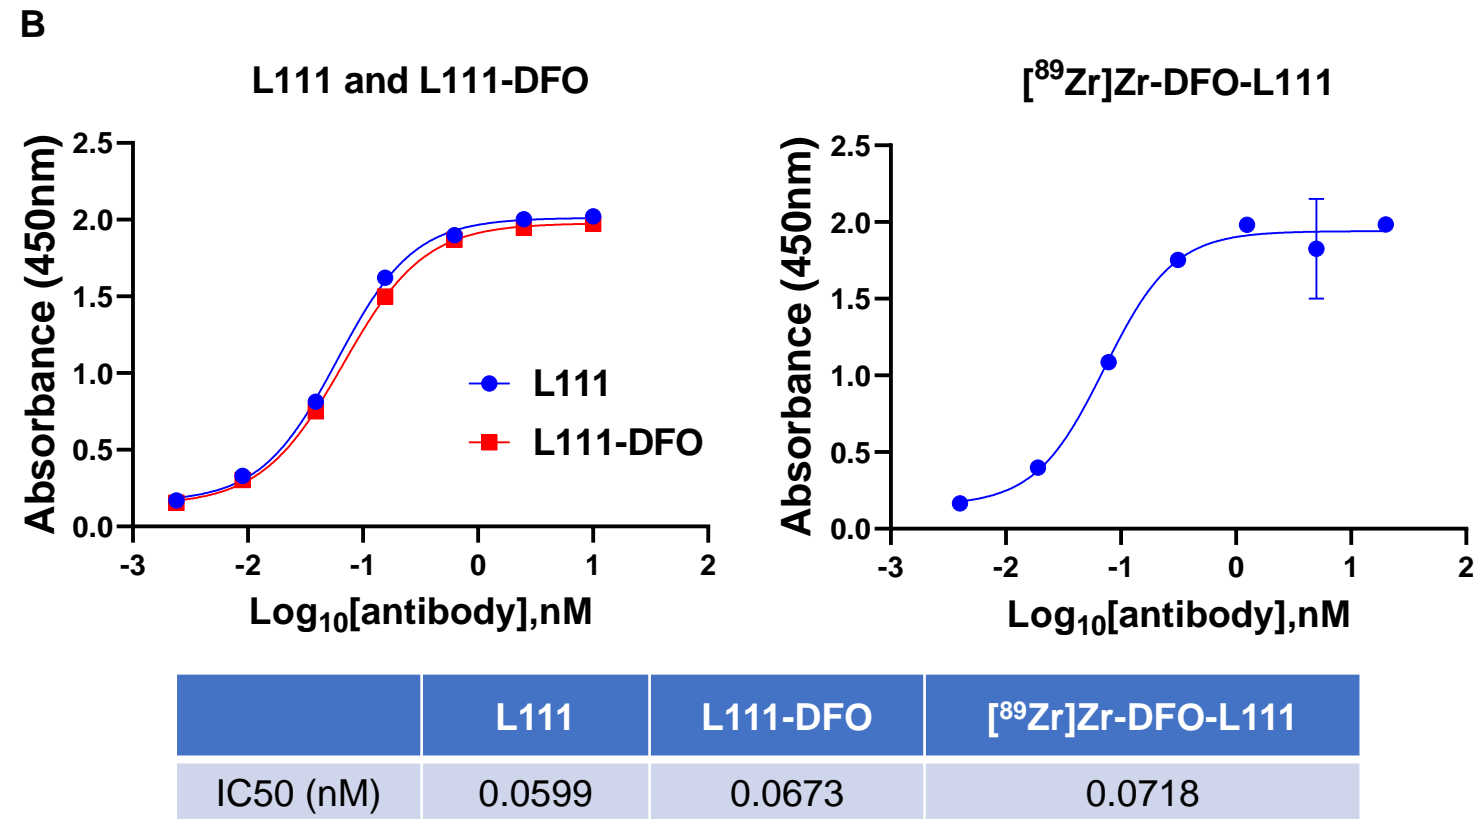

**Supplementary Figure 12. *In vitro* characterization of  $[^{89}\text{Zr}]\text{Zr-DFO-L111}$ .** **A.** SDS-PAGE under non-reducing and reducing conditions for the  $[^{89}\text{Zr}]\text{Zr-DFO-L111}$  developed by autoradiography. Four two-fold dilutions were loaded on the SDS-PAGE gel and developed by autoradiography. **B.** ELISA assay showing binding affinity of the  $[^{89}\text{Zr}]\text{Zr-DFO-L111}$  to recombinant TIP1 protein.
