# Supplementary material
Source: PubMed Central journal article supplement (PMC10984770)
Supplement: NIHMS1964070-supplement-16.pdf [file NIHMS1964070-supplement-16.pdf]

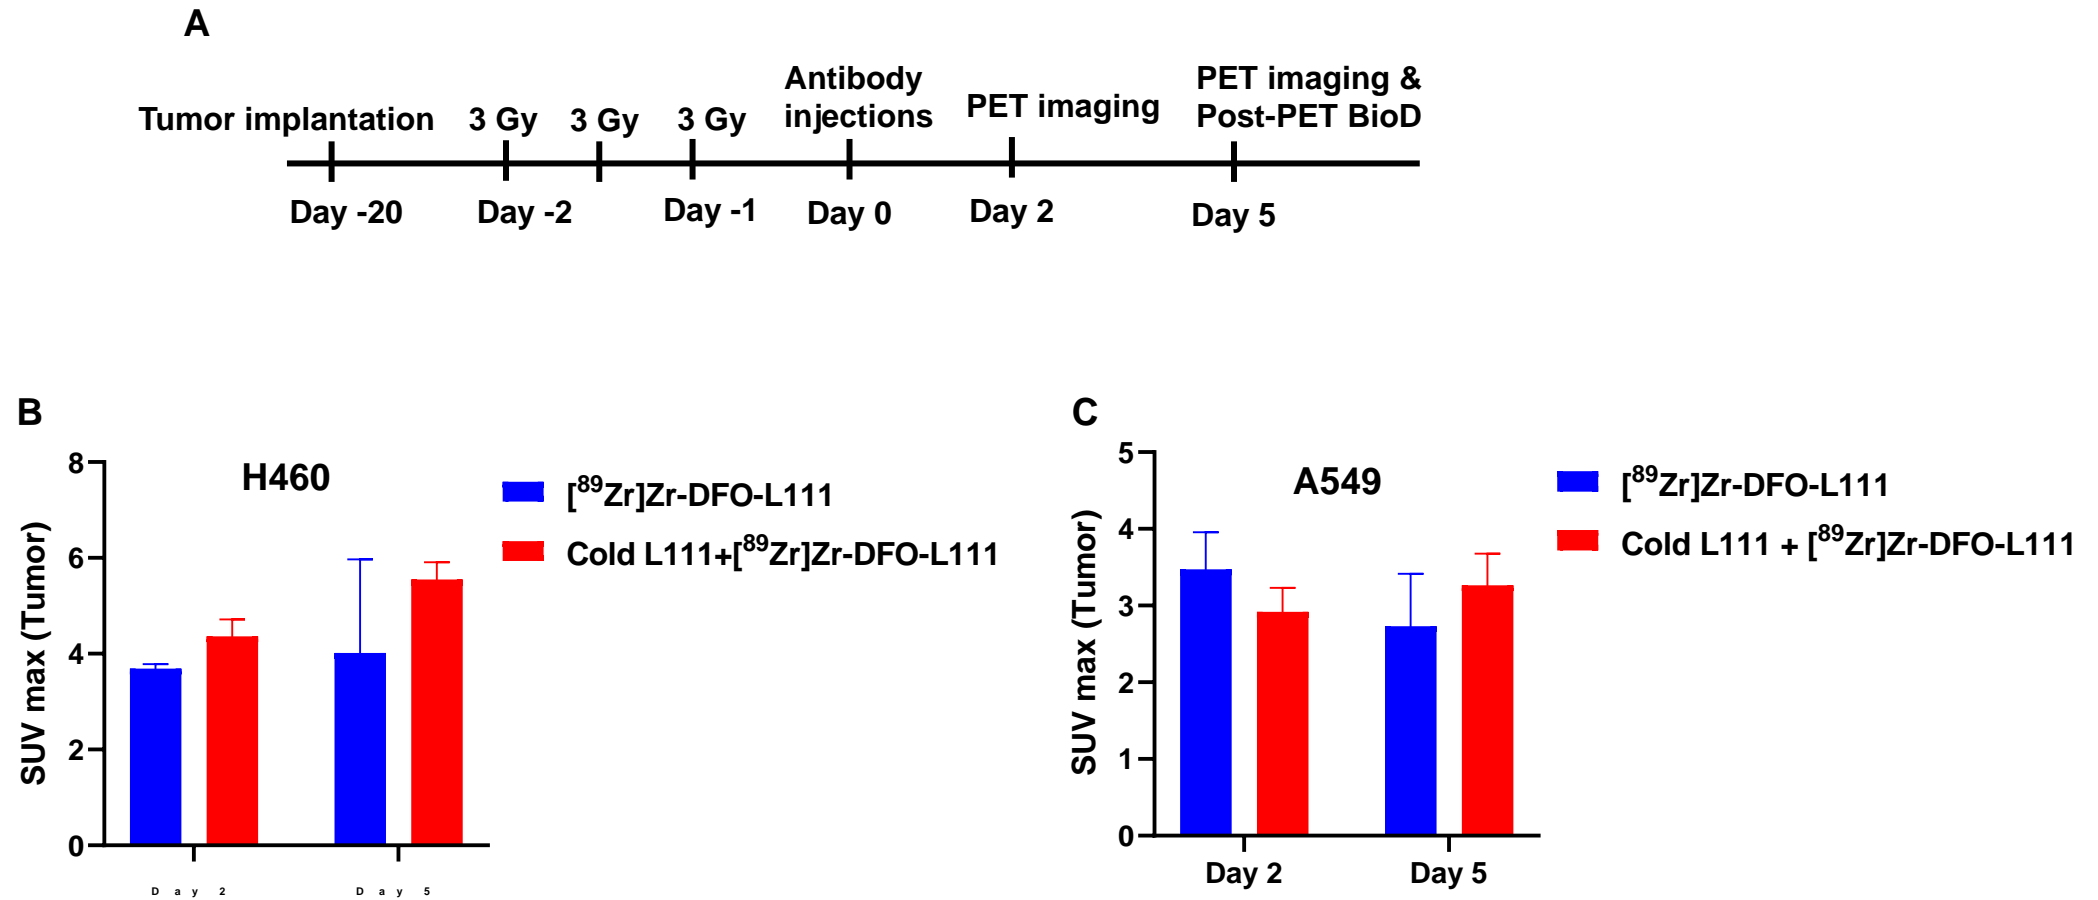

**Supplementary Figure 13. A.** Schematic representation of the tumor implantation, irradiation, antibody injection, PET imaging and post-PET biodistribution schedule. **B and C.** The tumor SUV max in H460 tumors (B) and A549 tumors (C) at days 2 and 5 post-injection (n=4).
