# Supplementary material
Source: PubMed Central journal article supplement (PMC10984770)

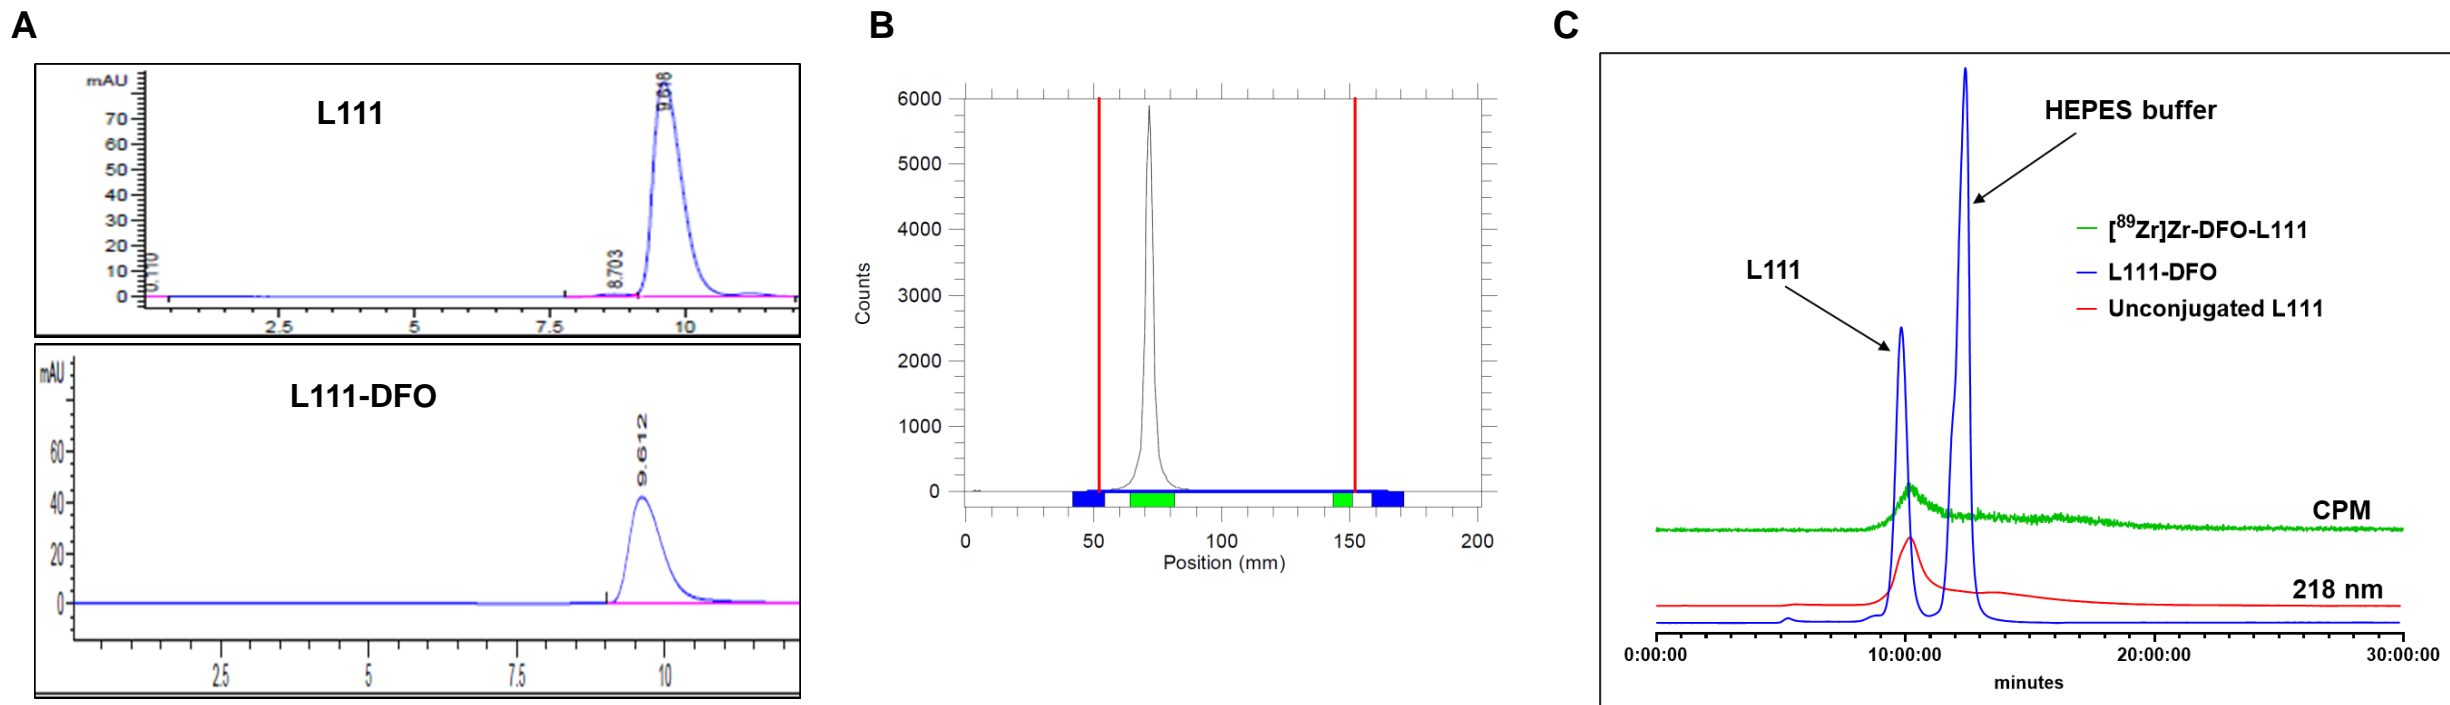

Supplement: NIHMS1964070-supplement-12.pdf [file NIHMS1964070-supplement-12.pdf]
